# Supplementary material for: Changes in the Prevalence of Metabolic Syndrome and Its Components as Well as in Relevant Preventive Medication between 2006 and 2018 in the Northeast Hungarian Population
Source: PubMed Central journal article supplement (PMC7829989; doi:10.3390/jpm11010052), 2021-01-16
Supplement: jpm-11-00052-s001.pdf [file jpm-11-00052-s001.pdf]

**Table 1.** Anthropometric and demographic characteristics of the study populations.

|             |        | Sample of 2006<br>Prevalence % (n) | Sample of 2018<br>Prevalence % (n) | p-value |
|-------------|--------|------------------------------------|------------------------------------|---------|
| Sex         | Male   | 48.22 (177)                        | 44.58 (147)                        | 0.379   |
|             | Female | 51.78 (233)                        | 55.42 (220)                        |         |
| Age groups  | 20-34  | 30.89 (99)                         | 24.69 (98)                         | 0.702   |
|             | 35-49  | 31.56 (142)                        | 39.04 (125)                        |         |
|             | 50-64  | 37.56 (169)                        | 36.27 (144)                        |         |
|             |        | Mean (95% CI)                      | Mean (95% CI)                      | p-value |
| Age (years) |        | 44.51 (43.36-45.29)                | 44.29 (42.99-45.59)                | 0.890   |

95% CI: 95% confidence interval.

**Table 2.** Biochemical, physical parameters and frequency of preventive medications used to estimate the prevalence of metabolic syndrome in the study populations by sex.

| A                              | Males                   |                         |                  | Females                 |                         |                  |
|--------------------------------|-------------------------|-------------------------|------------------|-------------------------|-------------------------|------------------|
|                                | Sample of 2006          | Sample of 2018          | p-value          | Sample of 2006          | Sample of 2018          | p-value          |
|                                | Mean (95% CI)           | Mean (95% CI)           |                  | Mean (95% CI)           | Mean (95% CI)           |                  |
| Fasting glucose (mmol/L)       | <b>4.79 (4.50-5.08)</b> | <b>5.34 (4.98-5.70)</b> | <b>&lt;0.001</b> | <b>4.47 (4.26-4.68)</b> | <b>5.15 (4.94-5.37)</b> | <b>&lt;0.001</b> |
| Fasting TG (mmol/L)            | 1.99 (1.67-2.31)        | 1.85 (1.65-2.06)        | 0.579            | 1.39 (1.28-1.50)        | 1.39 (1.28-1.50)        | 0.917            |
| HDL-C (mmol/L)                 | 1.35 (1.27-1.43)        | 1.25 (1.19-1.30)        | 0.176            | 1.53 (1.48-1.59)        | 1.46 (1.41-1.52)        | 0.150            |
| Waist circumference (cm)       | 97.64 (95.66-99.63)     | 98.52 (96.39-100.66)    | 0.498            | 92.11 (90.18-94.05)     | 94.15 (92.03-96.27)     | 0.230            |
| Systolic blood pressure (mmHg) | 129.35 (127.26-131.44)  | 129.56 (127.32-131.80)  | 0.379            | 124.46 (122.29-126.63)  | 124.91 (122.87-126.96)  | 0.469            |

|                                              |                            |                          |              |                           |                         |              |
|----------------------------------------------|----------------------------|--------------------------|--------------|---------------------------|-------------------------|--------------|
| Diastolic blood pressure (mmHg)              | 81.21 (79.87-82.56)        | 80.14 (78.90-81.39)      | 0.550        | 78.64 (77.49-79.79)       | 77.81 (76.55-79.08)     | 0.741        |
| B                                            |                            |                          |              |                           |                         |              |
| Prevalence of antihypertensive treatment (%) | 28.25 (22.01-35.19)        | 27.21 (20.51-34.80)      | 0.836        | 30.90 (25.23-37.04)       | 31.36 (25.51-37.71)     | 0.915        |
| Prevalence of antidiabetic treatment (%)     | 3.39 (1.43-6.85)           | 6.80 (3.55-11.73)        | 0.158        | 5.58 (3.16-9.09)          | 5.91 (3.35-9.61)        | 0.880        |
| Prevalence of lipid lowering therapy (%)     | <b>19.77 (14.42-26.10)</b> | <b>8.84 (5.05-14.24)</b> | <b>0.006</b> | <b>12.88 (9.04-17.63)</b> | <b>5.91 (3.35-9.61)</b> | <b>0.011</b> |

Significant differences in mean or prevalence rates are highlighted in **bold**. 95% CI: 95% confidence interval.
